# Supplementary material
Source: publisher figshare collection journal article supplement (https://karger.figshare.com/ndownloader/files/28985727)
Supplement: Supplementary file 1 [file 28985727]

**Online supplementary Fig. 1.** Concentration-response curve of CBD in proliferating SKOV-3 (P31–33) 24 h or 48 h following the application of CBD, measuring cellular metabolism using resazurin assays (*n* = 2–4 from two separate experiments). Absorbance data were compared to vehicle using a two-way ANOVA alongside a multiple comparison to assess for statistical difference. * *p* ≤ 0.05, **** *p* ≤ 0.0001.
